# Supplementary material
Source: Frontiers journal article supplement (https://www.frontiersin.org/articles/400819)
Supplement: Table_1.XLSX [file Table_1.XLSX]

## Sheet: Blatt1
Supplementary Table S1
Characteristics of the alpine sites and related climate and erosion input data used for modelling
European Alps, Appenine
												Present-day situation					Average situation during soil formation
Site /	Longitude	Latitude	Elevation	Aspect	Slope	Slope form*	Parent	Geomorphic situation	Vegetation	Soils (Soil taxonomy;	Soil age	MAP	MAT	Evapotranspiration	Surface runoff	Soil water flux	MAT	MAP	Evapotranspiration	Surface runoff	Soil water flux	Erosion	References
soil profile	°E	°N	m asl	°N	%		material			Soil Survey Staff, 2010)	y	mm/y	°C	mm/year	mm/year	mm/year	°C	mm/year	mm/year	mm/year	mm/year	t/km2/y
Morteratsch
S1	9° 56'39''	46° 26'49''	1930	330	10	planar	Granitic till	ground moraine	Green alder scrub	Typic Cryorthent	138	1000	0.7	300	200	500	0.7	1000	300	200	500	100	Mavris et al. (2010),
S2	9° 56'41''	46° 26'52''	1930	330	15	planar	Granitic till	ground moraine	Green alder scrub	Typic Cryorthent	128	1000	0.7	300	200	500	0.7	1000	300	200	500	120	Egli et al. (2003),
S3	9° 56'36''	46° 26'44''	1930	280	<5	planar	Granitic till	ground moraine	Epilobietum fleischeri with single willow shrubs and Alpenrose	Typic Cryorthent	108	1000	0.7	250	150	600	0.7	1000	250	150	600	100
S4	9° 56'36''	46° 26'42''	1935	320	<5	planar	Granitic till	ground moraine	Epilobietum fleischeri with single willow shrubs and Alpenrose	Typic Cryorthent	98	1000	0.7	250	150	600	0.7	1000	250	150	600	100
S5	9° 56'28''	46° 26'33'	1950	30	<5	planar	Granitic till	ground moraine	Pioneer grass communities	Typic Cryorthent	68	1000	0.7	250	150	600	0.7	1000	250	150	600	100
S6	9° 56'25''	46° 26'16'	2015	330	<5	planar	Granitic till	ground moraine	Epilobietum fleischeri with single willow shrubs and Alpenrose	Typic Cryorthent	48	1000	0.3	200	150	650	0.3	1000	200	150	650	120
S7	9° 56'06''	46° 26'13''	2015	260	<5	planar	Granitic till	ground moraine	Pioneer grass communities	Typic Cryorthent	48	1000	0.3	150	150	700	0.3	1000	150	150	700	120
S8	9° 56'07''	46° 26'20''	1990	150	<5	planar	Granitic till	ground moraine	Pioneer grass communities	Typic Cryorthent	58	1000	0.5	150	150	700	0.5	1000	150	150	700	100
S9	9° 56'08''	46° 26'25''	2000	30	<5	planar	Granitic till	ground moraine	Pioneer grass communities	Typic Cryorthent	73	1000	0.4	150	150	700	0.4	1000	150	150	700	100
S10	9° 56'13''	46° 26'33''	1980	60	<5	planar	Granitic till	ground moraine	Epilobietum fleischeri with single willow shrubs and Alpenrose	Typic Cryorthent	78	1000	0.6	150	150	700	0.6	1000	150	150	700	100
AS19	9° 56'15''	46° 25'57''	2020	300	<5	convex	Granitic till	ground moraine	Epilobietum fleischeri with single willow shrub	Typic Cryorthent	35	1000	0.5	250	150	600	0.5	1000	250	150	600	100
AS20	9° 56'06''	46° 25'57''	2020	100	<5	concave	Granitic till	ground moraine	Epilobietum fleischeri with single willow shrub	Typic Cryorthent	35	1000	0.5	250	150	600	0.5	1000	250	150	600	150
AS21	9° 56'00''	46° 25'57''	2020	90	<5	convex	Granitic till	ground moraine	Epilobietum fleischeri with single willow shrub	Typic Cryorthent	35	1000	0.5	250	150	600	0.5	1000	250	150	600	150
AS22	9° 56'05''	46° 25'53''	2025	10	10	convex	Granitic till	ground moraine	Epilobietum fleischeri with single willow shrub	Typic Cryorthent	30	1000	0.5	250	200	550	0.5	1000	250	200	550	250
AS23	9° 55'58''	46° 25'50''	2025	25	15	concave	Granitic till	ground moraine	Epilobietum fleischeri with single willow shrub	Typic Cryorthent	30	1000	0.5	250	250	500	0.5	1000	250	250	500	250
AS24	9° 56'04''	46° 25'49''	2025	120	<5	convex	Granitic till	ground moraine	Epilobietum fleischeri with single willow shrub	Typic Cryorthent	20	1000	0.5	250	150	600	0.5	1000	250	150	600	350
AS28	9° 55'56''	46° 25'40''	2025	110	<5	concave	Granitic till	ground moraine	no vegetation	Typic Cryorthent	3	1000	0.5	150	150	700	0.5	1000	150	150	700	500
AS29	9° 55'59''	46° 25'45''	2025	55	10	convex	Granitic till	ground moraine	no vegetation	Typic Cryorthent	3	1000	0.5	150	200	650	0.5	1000	150	200	650	500
1	9° 56'52''	46° 26'27''	1910	0	<5	planar	Granitic till	Lateral moraine	Epilobietum fleischeri with single willow shrubs and Alpenrose	Typic Cryorthent	140	1000	0.7	250	150	600	0.7	1000	250	150	600	100
2	9° 56'28''	46° 26'49''	1915	80	10	concave	Granitic till	ground moraine	Pioneer grass communities	Typic Cryorthent	120	1000	0.7	200	200	600	0.7	1000	200	200	600	110
3	9° 56'52''	46° 26'29''	1930	100	10	concave	Granitic till	ground moraine	Pioneer grass communities	Typic Cryorthent	100	1000	0.7	200	200	600	0.7	1000	200	200	600	100
4	9° 56'21''	46° 26'35''	1960	130	10	convex	Granitic till	ground moraine	rock vegetation	Typic Cryorthent	80	1000	0.5	150	200	650	0.5	1000	150	200	650	120
5	9° 56'11''	46° 26'24''	1980	120	10	concave	Granitic till	ground moraine	Pioneer grass communities	Typic Cryorthent	70	1000	0.5	150	200	650	0.5	1000	150	200	650	120
6	9° 56'01''	46° 26'05''	2025	160	10	concave	Granitic till	ground moraine	Green alder scrub	Typic Cryorthent	60	1000	0.2	200	200	600	0.2	1000	200	200	600	160
7	9° 56'05''	46° 26'40''	2010	90	<5	planar	Granitic till	ground moraine	Epilobietum fleischeri with single willow shrub	Typic Cryorthent	30	1000	0.3	150	150	700	0.3	1000	150	150	700	280
8	9° 56'06''	46° 25'54''	2010	90	<5	planar	Granitic till	ground moraine	Epilobietum fleischeri with single willow shrub	Typic Cryorthent	30	1000	0.3	150	150	700	0.3	1000	150	150	700	280
9	9° 55'58''	46° 25'54''	2015	80	5	planar	Granitic till	ground moraine	Epilobietum fleischeri with single willow shrub	Typic Cryorthent	20	1000	0.3	150	200	650	0.3	1000	150	200	650	350
A	9°56'38''	46°26'50	1930	330	10	planar	Granitic till	Lateral moraine	Green alder scrub	Typic Cryorthent	150	1000	0.8	300	200	500	0.8	1000	300	200	500	120
AC	9°56'27''	46°26'55''	1920	320	10	convex	Granitic till	Lateral moraine	Larch, Scots pine	Typic Dystrocryept	1300	1000	0.8	350	200	450	0.8	1000	350	200	450	50
AP	9°57'03''	46°27'02''	2030	350	10	planar	Granitic till	Lateral moraine	Larch, Scots pine	Typic Haplocryod	12500	1000	0.2	500	150	350	0.2	1000	500	150	350	32.5351
Gletsch
	8° 21'52''	46° 33'53''	1760	-	0	planar	Granitic till	end moraine	Pioneer grass communities	Typic Udorthent	150	2000	1.2	250	200	1550	1.2	2000	250	200	1550	130	Egli et al. (2001)
	8° 21'50''	46° 33'54''	1760	-	0	planar	Granitic till	end moraine	Pioneer grass communities	Typic Udorthent	260	2000	1.2	300	200	1500	1.2	2000	300	200	1500	80
	8° 21'46''	46° 33'52''	1760	-	0	planar	Granitic till	end moraine	Alpine grassland	Typic Udorthent	300	2000	1.2	300	200	1500	1.2	2000	300	200	1500	80
	8° 21'45''	46° 33'51''	1760	-	0	planar	Granitic till	end moraine	Alpine grassland	Typic Dystrudept	450	2000	1.2	350	200	1450	1.2	2000	350	200	1450	50
	8° 21'42''	46° 33'49''	1760	-	0	planar	Granitic till	end moraine	Alpine grassland	Typic Dystrudept	700	2000	1.2	350	200	1450	1.2	2000	350	200	1450	50
	8° 21'41''	46° 33'48''	1760	-	0	planar	Granitic till	end moraine	Alpine grassland	Typic Dystrudept	3000	2000	1.2	400	200	1400	1.2	2000	400	200	1400	35.5574
	8° 21'23''	46° 33'40''	1790	-	0	planar	Granitic till	Lateral moraine	Alpine grassland	Typic Haplorthod	10500	2000	1.2	400	200	1400	1.2	2000	400	200	1400	32.0957
Schmadri
	7°52'36	46°30'17"	2030	350	<5	planar	Granitic till	Lateral moraine	Alpine grassland	Typic Haplocryod	3500	2000	0.5	350	200	1450	0.5	2000	350	200	1450	38.3731	Egli et al. (2001)
	7°52'46''	46°30'26''	2020	10	<5	planar	Granitic till	Lateral moraine	Alpine grassland	Typic Haplocryod	11500	2000	0.5	350	200	1450	0.5	2000	350	200	1450	16.2716
Val Mulix
S1	9° 44'50''	46° 34'56''	2100	35	11	planar	Granitic till	Lateral moraine	Larch, Swiss pine, heath	Typic Haplocryod	14900	1250	-1.1	500	200	550	-1.1	1250	500	200	550	39.947	Böhlert et al. (2011)
S2	9° 45'07''	46° 34'35''	2060	0	16	planar	Granite debris	lower rock glacier lobe	Alpine grassland	Typic Haplocryod	10000	1250	-0.8	350	250	650	-0.8	1250	350	250	650	64.1913
S3	9° 45'13''	46° 34'41''	2150	315	9	planar	Granitic till	Lateral moraine	Alpine grassland	Typic Haplocryod	10700	1250	-1.3	350	250	650	-1.3	1250	350	250	650	48.5735
S4	9° 45'11''	46° 34'30''	2130	300	8	planar	Granite debris	middle rock glacier lobe	Alpine grassland	Typic Haplocryod	9600	1250	-1.2	350	250	650	-1.2	1250	350	250	650	48.1435
S5	9° 45'16''	46° 34'29''	2280	300	6	planar	Granite debris	upper rock glacier lobe	Alpine grassland	Typic Haplocryod	8600	1250	-2	350	250	650	-2	1250	350	250	650	47.2957
Val di Rabbi
S1	10° 27'36''	46° 13'42''	2100	60	32	planar	Paragneiss till	Lateral moraine	European larch, common Juniper	Typic Haplocryod	17311	1300	1.5	500	250	550	1.5	1300	500	250	550	38.7203	Favilli et al. (2009)
S2	10° 27'29''	46° 13'39	2230	70	55	planar	Paragneiss till	Lateral moraine	Rhododendron, dwarf shrubs, alpine grassland	Typic Haplocryod	11106	1300	0.7	500	300	500	0.7	1300	500	300	500	80.9559
S3	10° 28'34''	46° 13'30	2380	320	5	planar	Paragneiss till	Lateral moraine	Alpine grassland	Typic Cryorthent	10754	1300	0	300	250	750	0	1300	300	250	750	16.1912
S4	10° 28'33''	46° 13'29	2370	300	10	planar	Paragneiss till	Solifluction, ground moraine	Alpine grassland	Typic Cryorthent	8860	1300	0	300	250	750	0	1300	300	250	750	31.5305
S5	10° 27'36''	46° 13'42	2083	240	32	concave	Paragneiss till	Lateral moraine	European larch, common Juniper	Typic Haplocryod	10837	1300	1.5	500	300	500	1.5	1300	500	300	500	48.5735
S6	10° 27'36''	46° 13'44	2076	5	38	planar	Paragneiss till	Lateral moraine	European larch, common Juniper	Typic Haplocryod	4729	1300	1.6	500	250	550	1.6	1300	500	250	550	40.8984
S7	10° 27'29''	46° 13'44	2100	3	43	planar	Paragneiss till	Lateral moraine	European larch, common Juniper	Typic Haplocryod	5452	1300	1.5	500	250	550	1.5	1300	500	250	550	54.5311
S8	10° 26'18''	46° 13'54	2552	200	33	concave	Paragneiss till	Inactive rockglacier	Alpine grassland	Humic Dystrocryept	9203	1300	-1.1	250	250	800	-1.1	1300	250	250	800	47.2957
S9	10° 26'20''	46° 13'48	2449	90	0	planar	Paragneiss till	Recessional moraine	Alpine grassland	Typic Haplocryod	11197	1300	-0.4	300	150	850	-0.4	1300	300	150	850	16.1912
Meggerwald
Podzol	8°22′17	47°03′39''	620	325	< 10	planar	Granitic till	ground moraine	White fir, blueberry, European beech	Typic Haplorthod	19200	1300	7.5	650	100	550	5.78947	1163.16	557.895	100	505.263	14.8763
Cambisol	8°22′29''	47°03′31''	614	325	< 10	planar	Granitic till	ground moraine	White fir, blueberry, European beech	Spodic Dystrudept	19200	1300	7.5	650	100	550	5.78947	1163.16	557.895	100	505.263	14.8763	Egli et al., 2002; Egli et al., 2010
Lys Glacier																							d'Amico et al. (2014)
A2	7°48'51''	45°52'55''	2420	140	15°		Granitic till	lateral moraine	Grassland	Haplic Regosol	64	1200	-1.2	200	250	750	-1.2	1200	200	250	750	200
A3	7°48'49''	45°52'52''	2415	180	5°		Granitic till	lateral moraine	Grassland	Haplic Regosol	64	1200	-1.1	200	200	800	-1.1	1200	200	200	800	200
A4	7°48'53''	45°52'49''	2460	140	20°		Granitic till	lateral moraine	Grassland	Haplic Regosol	193	1200	-1.4	250	250	700	-1.4	1200	250	250	700	120
A5	7°48'56''	45°52'56''	2480	280	30°		Granitic till	lateral moraine	Grassland/dwarf shrubs	Haplic Cambisol	259	1200	-1.5	300	300	600	-1.5	1200	300	300	600	100
A6	7°49'07''	45°52'47''	2510	220	30°		Granitic till	lateral moraine	Grassland	Haplic Cambisol	11000	1200	-1.6	300	300	600	-1.6	1200	300	300	600	48.1435
Sila
Sila I	16°32’19’’	39°16’50’’	1572	195	2	convex	Volcanic deposits, granite	boulder field	Shrubs, grass	Vitric Cambisol	51600	1200	8	400	100	700	3.25	1112.31	400	100	612.308	132.703	Raab et al. (2017)
Sila II	16°32’19’’	39°16’50’’	1572	195	2	convex	Volcanic deposits, granite	boulder field	Shrubs, grass	Vitric Cambisol	46600	1200	8	400	100	700	3.25	1112.31	400	100	612.308	136.361
Wind River Range
												Present-day situation					Average situation during soil formation				Average situation during soil formation
Site /	Longitude	Latitude	Elevation	Aspect	Slope	Slope form*	Parent	Geomorphic situation	Vegetation	Soils (Soil taxonomy;	Soil age	MAP	MAT	Evapotranspiration	Surface runoff	Soil water flux	MAT	MAP	Evapotranspiration	Surface runoff	Soil water flux	Erosion	References
soil profile	°E	°N	m asl	°N	%		material			Soil Survey Staff, 2010)	y	mm/y	°C	mm/year	mm/year	mm/year	°C	mm/year	mm/year	mm/year	mm/year	t/km2/y
Bigfoot Lake cirque
BFL 9	109° 1'7"	42°38'12"	3414	-	0	Planar	Granitic till	End moraine	Lichen-covered boulders	Typic Cryorthent	150	850	-3.3	200	150	500	-3.3	850	200	150	500	180	Dahms (2002)
BFL 7	109° 1'1"	42° 38'20"	3358	-	0	Planar	Granitic till	Lateral/ end moraine	Alpine grassland	Typic Haplocryoll	9930	850		250	150	450		850	300	150	400	48.1435
BFL 6	109° 1'4"	42°38'22"	3365	-	0	Planar	Granitic till	End moraine	Alpine grassland	Typic Haplocryoll	9930	850	-3	300	150	400	-3	850	300	100	450	48.1435
BFL 5	109° 0'57"	42°38'22"	3353	-	0	Planar	Granitic till	Lateral/ end moraine	Alpine grassland	Typic Haplocryoll	12930	850	-3	300	100	450	-3	850	300	100	450	32.5351
BFL 4	109° 0'59"	42°38'24"	3348	-	0	Planar	Granitic till	End moraine	Alpine grassland	Typic Haplocryoll	12930	850		300	100	450		850	300	100	450	32.5351
BFL 3	109° 0'53"	42°38'26"	3338	-	0	Planar	Granitic till	Lateral moraine	Alpine grassland	Typic Haplocryoll	14500	850		300	100	450		850	300	100	450	31.9576
BFL 2	109° 0'35"	42°38'30"	3346	-	3	Planar	Granitic till	Lateral moraine	Alpine grassland	Typic Haplocryoll	14500	850		300	100	450		850	300	100	450	31.9576
BFL 1	109° 0'39"	42°38'31"	3347	-	0	Planar	Granitic till	Lateral moraine	Alpine grassland	Typic Haplocryoll	14500	850	-2.9	300	100	450	-2.9	850	300	100	450	31.9576
Helen Lake cirque
SCB 1	109° 0'38"	42°40'4"	3202	-	0	Planar	Granitic till	Medial moraine	Montane forest	Typic Haplocryept	16000	850		300	100	450		850	300	100	450	31.5072	Dahms (2002)
SCB 2	-	-	-	-	0	Planar	Granitic till	-	-	-	14500	850		300	100	450		850	300	100	450	31.9576
SCB 3	109° 0'3"	42°38'2"	3385	-	0	Planar	Granitic till	End moraine	Alpine grassland	Typic Haplocryoll	14500	850		300	100	450		850	300	100	450	31.9576
SCB 4	109° 0'1"	42°38'8"	3378	-	0	Planar	Granitic till	End moraine	Alpine grassland	Typic Haplocryoll	14500	850		300	100	450		850	300	100	450	31.9576
SCB 5	109° 0'7"	42°37'58"	3384	-	0	Planar	Granitic till	End moraine	Alpine grassland	Typic Haplocryoll	14500	850		300	100	450		850	300	100	450	31.9576
SCB 6	109° 0'21"	42°37'49"	3409	-	0	Planar	Granitic till	End moraine	Alpine grassland	Typic Haplocryoll	9930	850		300	100	450		850	300	100	450	48.1435
SCB 7	109° 0'22"	42°37'53"	3397	-	0	Planar	Granitic till	End moraine	Alpine grassland	Typic Haplocryoll	9930	850		300	100	450		850	300	100	450	48.1435
SCB 8	109° 0'18"	42°37'57"	3390	-	0	Planar	Granitic till	End moraine	Alpine grassland	Typic Haplocryoll	12930	850		300	100	450		850	300	100	450	32.5351
SCB 9	109° 0'12"	42°3'53"	3387	-	0	Planar	Granitic till	End moraine	Alpine grassland	Typic Haplocryoll	12930	850		300	100	450		850	300	100	450	32.5351
SCB 10	108°59'59"	42°37'58"	3406	-	0	Planar	Granitic till	Kame terrace/lateral moraine	Alpine grassland	Typic Haplocryoll	22000	850	-3.3	300	50	500	-5.66364	819.091	300	50	469.091	30
SCB 11	109° 0'3"	42°38'11"	3375	-	0	Planar	Granitic till	Lateral/ end moraine	Alpine grassland	Typic Haplocryoll	14500	850		300	100	450		850	300	100	450	31.9576
SCB 12	109° 0'26"	42°37'42"	3457	-	0	Planar	Granitic till	End moraine	Alpine grassland	Typic Cryorthent	1500	850	-3.7	250	150	450		850	250	150	450	41.5478	Dahms (2002)
LC 1	109° 0'35"	42°39'35"	3228	-	0	Planar	Granitic till	Medial moraine	Montane forest	Typic Haplocryept	16000	850	-3.7	300	100	450		850	300	100	450	31.5072
WL 1	109° 0'35"	42°38'46"	3278	-	0	Planar	Granitic till	Medial moraine	Krummholtz	Typic Haplocryept	16000	850	-3.7	300	100	450		850	300	100	450	31.5072
IL 1	109° 0'59"	42°3'16"	3287	-	0	Planar	Granitic till	Lateral/ end moraine	Alpine grassland	Typic Haplocryoll	12930	850	-3.7	300	100	450		850	300	100	450	48.8026
Roaring Fork Pass
RFP 1	108°59'58"	42°39'19"	3343	270	2	Planar	Granitic till	Kame terrace/lateral moraine	Alpine grassland	Typic Haplocryoll	22000	850	-3.7	300	100	450	-6.06364	819.091	300	100	419.091	50.9091
RFP 2	108°59'58"	42°39'19"	3347	270	2	Planar	Granitic till	Kame terrace/lateral moraine	Alpine grassland	Typic Argicryoll	22000	850	-3.7	300	100	450	-6.06364	819.091	300	100	419.091	50.9091	Dahms (2002)
						Planar
Pinedale, Bull Lake and Sacagawea Ridge soils						Planar
PAF-1	108°51'59"	42°44'2"	2422			Planar	Granitic till	Lateral moraine	Limber pine - common juniper - sagebrush	Ustic Haplocryoll	22000	550	3	400	0	150	0.636364	530	400	0	130	50.9091	Dahms (2004)
PAF-2	108°52'1"	42°43'58"	2378			Planar	Granitic till	Lateral moraine	Limber pine - common juniper - sagebrush	Ustic Haplocryoll	22000	550	3	400	0	150	0.636364	530	400	0	130	50.9091
G-1	108°51'24"	42°43'32"	2339	60	4	Planar	Granitic till	Lateral moraine	Montane forest	Ustic Argicryoll	130000	500	3.5	350	0	150	-1.05	465	300	0	165	19.3734	Dahms (2004)
G-2	108°51'28"	42°43'24"	2390	60	4	Planar	Granitic till	Lateral moraine	Montane forest	Ustic Argicryoll	630000	500	3.5	350	0	150	-1.48672	461.641	300	0	161.641	17.4637
G-3	108°51'34"	42°43'25"	2414	60	5	Planar	Granitic till	Lateral moraine	Montane forest	Ustic Argicryoll	130000	500	3.5	350	20	130	-1.05	465	300	20	145	30.9974
G-5	108°50'44"	42°43'48"	2253	10	10	Planar	Granitic till	Lateral moraine	Montane forest	Ustic Argicryoll	65000	500	3.5	350	30	120	-1.6	460.769	300	30	130.769	51.7569
G-7	108°50'56"	42°43'39"	2235	10	10	Planar	Granitic till	Lateral moraine	Montane forest	Ustic Haplocryoll	65000	500	3.5	350	30	120	-1.6	460.769	300	30	130.769	51.7569
G-8	108°51'02"	42°43'41"	2221	10	10	Planar	Granitic till	Lateral moraine	Montane forest	Ustic Haplocryoll	22000	500	3.5	350	30	120	1.13636	481.818	300	30	151.818	69.0874
SC-1	108°48'46"	42°44'47"	1989	55	2	Planar	Granitic till	Lateral moraine	Grass - sagebrush	Ustic Argicryoll	65000	450	4.5	350	0	100	-0.6	414.692	300	0	114.692	31.0542	Dahms (2004)
SC-2	108°48'53"	42°44'43"	1997	55	2	Planar	Granitic till	Lateral moraine	Grass - sagebrush	Ustic Haplocryoll	22000	450	4.5	350	0	100	2.13636	433.636	310	0	123.636	50.9091
HR-1	108°47'27"	42°46'0"	1854	40	2	Planar	Granitic till	Lateral moraine	Grass - sagebrush	Ustic Argicryoll/Palecryoll	640000	400	5.5	300	0	100	3.13636	385.455	270	0	115.455	20.8231	Dahms (2004)
HR-2	108°47'30"	42°45'58"	1850	40	2	Planar	Granitic till	Lateral moraine	Grass - sagebrush	Calcicryid	130000	400	5.5	300	0	100	0.95	372	250	0	122	23.2481
							Granitic till
WD-1	108°47'26"	42°44'53"	2115	45	4	Planar	Granitic till	Lateral moraine	Grass - sagebrush	Calcicryid	640000	400	5.5	300	0	100	0.49	369.169	270	0	99.1692	20.8231	Dahms (2004)
Pete's Lake Road
PLR 1	108°53'15"	42°43'40"	2640	60	1	Planar	Granitic till	Lateral moraine	Limber pine - common juniper - sagebrush	Ustic Argicryoll	130000	550	3	350	0	200	-1.55	511.5	280	0	231.5	23.2481	Dahms (2004),
PLR 2	108°53'8"	42°43'36"	2579	60	1	Planar	Granitic till	Lateral moraine	Limber pine - common juniper - sagebrush	Ustic Haplocryoll	22000	550	3	400	0	150	0.636364	530	310	0	220	50.9091	Fabel et al. (2004)
Fairfield Creek
FC 6	108°51'26"	42°44'5"	2331							Ustic Argicryoll	65000	500	3.5	350	0	150	-1.6	460.769	300	0	160.769	25.8785
FC 5	108°51'13"	42°44'8"	2329	-	0	Planar	Granitic till	Lateral moraine	Limber pine, juniper, sagebrush	Ustic Argicryoll	65000	500	3.5	350	0	150	-1.6	460.769	300	0	160.769	25.8785	Dahms (2004), Fabel et al. (2004)
FC 4	108°52'0"	42°44'2"	2423							Ustic Haplocryoll	22000	500	3.5	350	0	150	-1.6	460.769	300	0	160.769	34.5437
FC 3	108°52'2"	42°44'6"	2434							Ustic Argicryoll	65000	500	3.5	350	0	150	-1.6	460.769	250	0	210.769	25.8785
FC 2	108°51'29"	42°44'10"	2426	-	0	Planar	Granitic till	Lateral moraine	Limber pine, juniper, sagebrush	Ustic Argicryoll/Palecryoll	630000	500	3.5	350	0	150	-1.48672	461.641	250	0	211.641	13.971
FC 1	108°51'49"	42°44'12"	2441							Ustic Argicryoll	130000	500	3.5	350	0	150	-1.05	460.769	250	0	210.769	20.7028
Deer Spring
DS 1	108°48'48"	42°44'7"	2304	-	0	Planar	Granitic till	Lateral moraine	Sagebrush, fescue, wheatgrass	Ustic Argicryoll/Palecryoll	850000	500	3	300	50	150	-2.13118	460.529	250	50	160.529	13.3473	Dahms (2004), Fabel et al. (2004)
Table Mountain
TM-1	108°45'36"	42°45'20"	2225	-	0	Planar	Granitic till	Unidentified till feature	Sagebrush, fescue, wheatgrass	Ustic Argicryoll/Palecryoll	1200000	450	3	300	0	150	-2.13118	414.476	250	0	164.476	13.3473	Dahms (2004)
P1 Alice Lake	109.2229 °	42.7687 °	3213	60	1-25	Planar	Granitic till	End moraine	Alpine tundra	Cambisol (Humic, Loamic)	11845.5	800-900	-2.3	250	100	500	-2.3	850	250	100	500	280	de Castro Portes et al. (2018)
P2 Temple Lake	109.2182 °	42.7683 °	3190	350	3-27	Planar	Granitic till	Lateral moraine	Alpine tundra/ Krummholz	Protostagnic Cambisol (Humic, Loamic, Raptic)	15549.5	800-900	-2	350	50	450	-2	850	250	50	550	195
P3 Lonesome Lake	109.213 °	42.777 °	3104	45	1-27	Planar	Granitic till	End moraine	Montane forest	Entic Podzol (Arenic)	15760	800-900	-1.7	450	0	400	-1.7	850	250	0	600	140
Popo Agie River
RCT2	108°39'54"	42°40'39"	1722		0	planar	Red Peak/Chugwater fines over coarse granitic gravels	outwash terrace	Grass, Sagebrush	Haplocryids	20000	250-380	6.7	250	0	65	4.74455	305.55	240	0	65.55	29.0696	Dahms and Egli (2016)
RCT3	108° 40'10"	42°40'40"	1750		0	planar	Red Peak/Chugwater fines over coarse granitic gravels	outwash terrace	Grass, Sagebrush	Petrocryids/Calcicryids	160000	250-380	6.6	250	0	65	1.68437	291.178	230	0	61.1781	14.1452
RCT4	108° 40'10"	42°40'24"	1768		0	planar	Red Peak/Chugwater fines over coarse granitic gravels	outwash terrace	Grass, Sagebrush	Petrocryids/Calcicryids	260000	250-380	6.4	250	0	65	1.7	292.223	230	0	62.2231	14.9434
RCT5	108° 40'19"	42°40'17"	1795		0	planar	Red Peak/Chugwater fines over coarse granitic gravels	outwash terrace	Grass, Sagebrush	Petrocryids/Calcicryids	660000	250-380	6.3	250	0	65	1.26742	290.611	230	0	60.6114	13.7123
LWS-13-1	108° 43'34"	42°49'47"	1643		0	planar	granitic alluvium	outwash terrace	Grass, Sage, riparian	Petrocryids/Calcicryids	160000	330	7.2	250	0	80	2.28437	305.044	230	0	75.0437	14.1452
SB	108°43'12"	42°49'30"	1676		0	planar	granitic alluvium	outwash terrace	Grass, Sagebrush	Petrocryids/Calcicryids	260000	330	7	250	0	80	2.3	292.223	230	0	62.2231	14.9434
PB-13-1	108°53'16"	42°52'08"	1826		0	planar	organic-rich granitic	outwash terrace	Grass, Sage, riparian	Haplocryids	5000	250-380	6.1	250	0	65	6.1	315	250	0	65	27.2656
GalPD	108°51'39"	42°53'03"	1768		0	planar	Red Peak/Chugwater fines over coarse granitic gravels	outwash terrace	Grass, Sage, riparian	Haplocryids	20000	250-380	6.4	250	0	65	4.45273	305.55	230	0	75.55	29.0696
GR-13-1	108°51'47"	42°53'12"	1798		0	planar	granitic alluvium	outwash terrace	Grass, Sagebrush	Petrocryids/Calcicryids	160000	250-380	6.3	250	0	65	1.38437	291.178	230	0	61.1781	14.1452
GR-13-2	108°52'15"	42°52'46"	1838		0	planar	granitic alluvium	outwash terrace	Grass, Sagebrush	Petrocryids/Calcicryids	260000	250-380	6	250	0	65	1.3	292.223	230	0	62.2231	14.1452
PB-13-2	108°52'58"	42°52'28"	1908		0	planar	granitic alluvium	outwash terrace	Grass, Sagebrush	Petrocryids/Calcicryids	660000	250-380	5.6	250	0	65	0.567424	290.611	230	0	60.6114	13.7123
Other alpine sites
												Present-day situation					Average situation during soil formation				Average situation during soil formation
Site /	Longitude	Latitude	Elevation	Aspect	Slope	Slope form*	Parent	Geomorphic situation	Vegetation	Soils (Soil taxonomy;	Soil age	MAP	MAT	Evapotranspiration	Surface runoff	Soil water flux	MAT	MAP	Evapotranspiration	Surface runoff	Soil water flux	Erosion	References
soil profile	°E	°N	m asl	°N	%		material			Soil Survey Staff, 2010)	y	mm/y	°C	mm/year	mm/year	mm/year	°C	mm/year	mm/year	mm/year	mm/year	t/km2/y
China
Sichuan																							He and Tang (2008)
Profile 2	101°59'47''	29°34'11''	2880–2940				biotite schist, granodirite, quartzite	ground moraine	pionieer plants		39	1949	4	200	200	1549	4	1949	200	200	1549	250
Profile 3	101°59'47''	29°34'11''	2880–2940				biotite schist, granodirite, quartzite	recessional moraine	grassland		70	1949	4	250	200	1499	4	1949	250	200	1499	180
Profile 4	101°59'47''	29°34'11''	2880–2940				biotite schist, granodirite, quartzite	ground moraine	grassland		98	1949	4	250	200	1499	4	1949	250	200	1499	170
Profile 5	101°59'47''	29°34'11''	2880–2940				biotite schist, granodirite, quartzite	ground moraine	Grassland/dwarf shrubs		130	1949	4	300	200	1449	4	1949	300	200	1449	140
Profile 6	101°59'47''	29°34'11''	2880–2940				biotite schist, granodirite, quartzite	lateral moraine	Grassland/dwarf shrubs		159	1949	4	350	200	1399	4	1949	350	200	1399	120
Profile 7	101°59'47''	29°34'11''	2880–2940				biotite schist, granodirite, quartzite	terminal moraine	coniferous forest		183	1949	4	550	100	1299	4	1949	550	100	1299	110
Peru
J1	70°40' - 71°25' W	13°30' - 14°00' S	3670				till (volcanic material)	moraine crest	Puna		18918.5	1500	10.531	350	100	1050	9.47837	1476.32	350	100	1026.32	50	Goodman et al. (2001), Schauwecker et al. (2014)
J2	70°40' - 71°25' W	13°30' - 14°00' S	3675				till (volcanic material)	moraine crest	Puna		18918.5	1500	10.4985	350	100	1050	9.44587	1476.32	350	100	1026.32	50
J3	70°40' - 71°25' W	13°30' - 14°00' S	4030				till (volcanic material)	moraine crest	Puna		17185	1500	8.191	350	100	1050	7.40727	1420.59	350	100	970.588	50
J4	70°40' - 71°25' W	13°30' - 14°00' S	4110				till (volcanic material)	moraine crest	Puna		12250	1500	7.671	350	100	1050	7.671	1200	350	100	750	50
U1	70°40' - 71°25' W	13°30' - 14°00' S	4500				till (volcanic material)	moraine crest	Puna		45890	1500	5.136	350	100	1050	2.35339	1500	350	100	1050	50
U2	70°40' - 71°25' W	13°30' - 14°00' S	4450				till (volcanic material)	moraine crest	Puna		17073	1500	5.461	350	100	1050	4.72798	1420.59	350	100	970.588	50
U3	70°40' - 71°25' W	13°30' - 14°00' S	4355				till (volcanic material)	moraine crest	Puna		17073	1500	6.0785	350	100	1050	5.33401	1420.59	350	100	970.588	50
U4	70°40' - 71°25' W	13°30' - 14°00' S	4370				till (volcanic material)	moraine crest	Puna		17073	1500	5.981	350	100	1050	5.23832	1420.59	350	100	970.588	50
U5	70°40' - 71°25' W	13°30' - 14°00' S	4385				till (volcanic material)	moraine crest	Puna		2969.5	1500	5.8835	350	100	1050	5.8835	1500	350	100	1050	120
U6	70°40' - 71°25' W	13°30' - 14°00' S	4400				till (volcanic material)	moraine crest	Puna		2969.5	1500	5.786	350	100	1050	5.786	1500	350	100	1050	120
U7	70°40' - 71°25' W	13°30' - 14°00' S	4420				till (volcanic material)	moraine crest	Puna		2969.5	1500	5.656	350	100	1050	5.656	1500	350	100	1050	100
U8	70°40' - 71°25' W	13°30' - 14°00' S	4450				till (volcanic material)	moraine crest (end moraine)	Puna		397.5	1500	5.461	350	100	1050	5.461	1500	350	100	1050	140
M1	70°40' - 71°25' W	13°30' - 14°00' S	4010				till (volcanic material)	moraine crest	Puna		18918.5	1500	8.321	350	100	1050	7.26837	1476.32	350	100	1026.32	50
Q1	70°40' - 71°25' W	13°30' - 14°00' S	4670				till (volcanic material)	moraine crest	Puna		25460	1500	4.031	350	100	1050	2.271	1374	350	100	924	50
Q2	70°40' - 71°25' W	13°30' - 14°00' S	4655				till (volcanic material)	moraine crest	Puna		17554	1500	4.1285	350	100	1050	3.23811	1450	350	100	1000	50
Q3	70°40' - 71°25' W	13°30' - 14°00' S	4745				till (volcanic material)	moraine crest	Puna		14380.5	1500	3.5435	350	100	1050	3.5435	1307.14	350	100	857.143	50
Q4	70°40' - 71°25' W	13°30' - 14°00' S	4940				till (volcanic material)	moraine crest	Puna		12763.5	1500	2.276	350	100	1050	2.276	1200	350	100	750	50
